# Supplementary material for: OsMYB58 Negatively Regulates Plant Growth and Development by Regulating Phosphate Homeostasis
Source: MDPI journal article supplement (doi:10.3390/ijms25042209), 2024-02-12
Supplement: s1 [file s1]

*Supporting information*

# **OsMYB58 negatively regulates plant growth and development by regulating phosphate homeostasis**

**Dongwon Baek<sup>1,†</sup>, Soyeon Hong<sup>2,†</sup>, Hye Jeong Kim<sup>3</sup>, Sunok Moon<sup>4</sup>, Ki Hong Jung<sup>4</sup>, Won Tae Yang<sup>3,\*</sup>, and Doh Hoon Kim<sup>3,\*</sup>**

<sup>1</sup> Plant Molecular Biology and Biotechnology Research Center, Gyeongsang National University, Jinju 52828, Republic of Korea

<sup>2</sup> National Agrobiodiversity Center, National Institute of Agricultural Sciences, Rural Development Administration, Jeonju 54874, Republic of Korea

<sup>3</sup> College of Life Science and Natural Resources, Dong-A University, Busan 49315, Republic of Korea

<sup>4</sup> Graduate School of Biotechnology and Crop Biotech Institute, Kyung Hee University, Yongin 17104, Republic of Korea

<sup>†</sup> These authors contributed equally to this work

\* Correspondence: [wtyang@dau.ac.kr](mailto:wtyang@dau.ac.kr) Tel.: +82-51-200-7507 (W.T.Y.), [dhkim@dau.ac.kr](mailto:dhkim@dau.ac.kr); Tel.: +82-51-200-7507 (D.H.K.)

**Supplementary Materials:**

**Supplementary Figure S1.** Transcriptional expression of *OsMYB58* in rice under nutrient deficiency conditions.

**Supplementary Figure S2.** Transcriptional expression of *OsMYB63* in rice under nutrient deficiency conditions.

**Supplementary Table S1.** Lists of primers in this study

**Supplementary Table S2.** The shoot and root biomass of Arabidopsis wild-type Col-0 and *OsMYB58*-AraOX plants

**Supplementary Table S3.** The shoot and root biomass of rice wild-type, *OsMYB58*-OX, and *OsMYB58*-KO plants

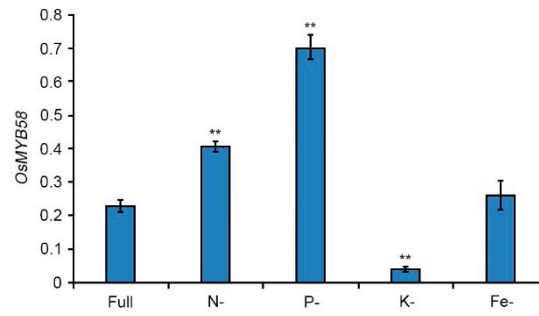

**Supplementary Figure S1. Transcriptional expression of *OsMYB58* in rice under nutrient deficiency conditions.** For qRT-PCR analysis, total RNA extracted from 7-day-old seedlings of rice wild-type plants (*Oryza sativa* L. 'Ilmi') growing in various nutrient deficiency conditions. Rice plants were transferred to nitrogen (N-; 0.25 mM), phosphate (P-; 0.0125 mM), potassium (K-; 0.01 mM), or iron (Fe-; 0.01 mM)-deficient media and grown for 7 days. The qRT-PCR analyzed the transcript levels of the *OsMYB58* gene using specific primers in Supplementary Table S1. Expression of *OsACTIN1* was used for the normalization. Error bars represent the mean  $\pm$  standard deviation (SD) of three biological replicates. Asterisks represent significant differences from the full sample (\*\*; p-value  $\leq$  0.01, Student's t-test).

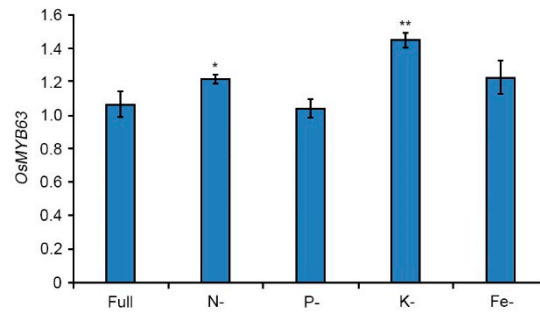

**Supplementary Figure S2. Transcriptional expression of *OsMYB63* in rice under nutrient deficiency conditions.** For qRT-PCR analysis, total RNA extracted from 7-day-old seedlings of rice wild-type plants (*Oryza sativa* L. 'Ilmi') growing in various nutrient deficiency conditions. Rice plants were transferred to nitrogen (N-; 0.25 mM), phosphate (P-; 0.0125 mM), potassium (K-; 0.01 mM), or iron (Fe-; 0.01 mM)-deficient media and grown for 7 days. The qRT-PCR analyzed the transcript levels of the *OsMYB63* gene using specific primers in Supplementary Table S1. Expression of *OsACTIN1* was used for the normalization. Error bars represent the mean  $\pm$  standard deviation (SD) of three biological replicates. Asterisks represent significant differences from the full sample (\*;  $0.01 < p\text{-value} \leq 0.05$ ; \*\*,  $p\text{-value} \leq 0.01$ , Student's t-test).

**Supplementary Table S1.** Lists of primers in this study

| Gene                  | Direction | Sequence (5'→3')                | Purpose                             |
|-----------------------|-----------|---------------------------------|-------------------------------------|
| <i>OsMYB58</i> -RT    | Forward   | CATCGCCTACATCCAGAAG             | Analysis of<br>qRT-PCR or<br>RT-PCR |
|                       | Reverse   | GAGATGTCGATGTCTTGCTC            |                                     |
| <i>OsACTIN</i> -RT    | Forward   | ATGCTCTCCCCCATGCTATC            |                                     |
|                       | Reverse   | TCTTCCTTGCTCATCCTGTC            |                                     |
| <i>AtTUBULIN2</i> -RT | Forward   | TGGCATCAACTTTCATTGGA            |                                     |
|                       | Reverse   | ATGTTGCTCTCCGCTTCTGT            |                                     |
| <i>OsmiR399a</i> -qRT | Forward   | GCTGGAAATGATGCTGGTAGC           |                                     |
|                       | Reverse   | CTCCTTTGGCACGAGATCTGT           |                                     |
| <i>OsmiR399j</i> -qRT | Forward   | GGAGCATGTAAGTCTTTTGTAGC         |                                     |
|                       | Reverse   | GGCAACTCTCCTTTGGCAGA            |                                     |
| <i>OsIPS1</i> -qRT    | Forward   | CTAAGGTAGGGCAACTTGTATC          |                                     |
|                       | Reverse   | TTATTAGAGCAAGGACCGAAAC          |                                     |
| <i>OsPHO2</i> -qRT    | Forward   | GGTGCAGCTGGAACACCTTA            |                                     |
|                       | Reverse   | GCACCGGAATGGTAGTGAA             |                                     |
| <i>OsPT2</i> -qRT     | Forward   | GACGAGACCGCCCAAGAAC             |                                     |
|                       | Reverse   | TTTTCAGTCACTCACGTCGAGAC         |                                     |
| <i>OsPT4</i> -qRT     | Forward   | TTCTGCTAGTGTACCAAACAAAATTACA    |                                     |
|                       | Reverse   | CTAAGTGGCATTTATAATATCAACAGTAACC |                                     |
| <i>OsMYB63</i> -qRT   | Forward   | AGGACTTGGAGAAGGAGCT             |                                     |
|                       | Reverse   | TTGGAAGTAGCACGACACTG            |                                     |
| <i>OsACTIN</i> -qRT   | Forward   | GAACTGGTATGGTCAAGGCTG           |                                     |
|                       | Reverse   | ACACGGAGCTCGTTGTAGAAG           |                                     |
| <i>OsMYB58</i> -KO    | P1        | CGAACACGCAAGAATTAAC             | Genotyping<br>from RNAi-<br>plants  |
|                       | P2        | GCTAAGCACACGTGTAGGAT            |                                     |
|                       | P3        | GGTGAATGGCATCGTTTGAA            |                                     |

**Supplementary Table S2.** The shoot and root biomass of Arabidopsis wild-type Col-0 and *OsMYB58*-AraOX plants

|         |                  | Fresh weight of shoots (mg) | Fresh weight of roots (mg) | Length of primary roots (mm) | Number of lateral roots | Pi in shoots (nM/mg FW) | Pi in roots (nM/mg FW) |
|---------|------------------|-----------------------------|----------------------------|------------------------------|-------------------------|-------------------------|------------------------|
| High Pi | Col-0            | 7.633±0.447                 | 4.100±0.548                | 68.302±2.658                 | 19.4±1.140              | 283.969±2.659           | 290.360±3.018          |
|         | OsMYB58-AraOX #1 | 6.567±2.702                 | 3.100±1.140                | 57.964±4.080                 | 16.4±1.140              | 270.724±5.673           | 199.466±5.064          |
|         | OsMYB58-AraOX #2 | 6.833±5.148                 | 2.933±1.140                | 57.836±5.089                 | 14.4±3.050              | 269.202±5.833           | 206.873±9.540          |
|         | OsMYB58-AraOX #4 | 6.067±0.548                 | 2.900±0.894                | 52.584±3.651                 | 13±0.707                | 247.971±6.081           | 196.415±1.983          |
|         | OsMYB58-AraOX #7 | 5.733±0.548                 | 2.633±0.447                | 52.144±2.575                 | 11.8±0.837              | 251.950±0.590           | 163.806±1.695          |
| Low Pi  | Col-0            | 3.267±0.548                 | 2.067±0.548                | 49.102±0.643                 | 16.4±2.408              | 217.457±1.494           | 249.371±1.944          |
|         | OsMYB58-AraOX #1 | 2.333±1.732                 | 1.633±0.837                | 44.526±2.550                 | 13.2±1.924              | 195.050±3.080           | 168.463±8.974          |
|         | OsMYB58-AraOX #2 | 2.400±1.949                 | 1.500±1.000                | 43.496±2.453                 | 12.8±3.033              | 202.268±5.161           | 174.302±9.552          |
|         | OsMYB58-AraOX #4 | 2.200±0.447                 | 1.633±0.447                | 41.37±1.101                  | 8.2±0.837               | 181.310±1.643           | 152.743±1.947          |
|         | OsMYB58-AraOX #7 | 1.800±0.447                 | 1.333±0.707                | 41.096±1.180                 | 8.8±0.837               | 151.431±0.589           | 140.571±3.936          |

**Supplementary Table S3.** The shoot and root biomass of rice wild-type, *OsMYB58*-OX, and *OsMYB58*-KO plants

|         |                | Fresh weight of shoots (mg) | Fresh weight of roots (mg) | Length of shoots (cm) | Length of primary roots (mm) | Length of seminal roots (cm) | Number of seminal roots | Length of lateral roots (cm) | Number of lateral roots | Length of root hair (mm) | Number of lateral roots per 1cm primary roots | Pi in shoots (nM/mg F.W.) | Pi in roots (nM/mg F.W.) |
|---------|----------------|-----------------------------|----------------------------|-----------------------|------------------------------|------------------------------|-------------------------|------------------------------|-------------------------|--------------------------|-----------------------------------------------|---------------------------|--------------------------|
| High Pi | WT             | 105.000<br>±4.000           | 57.667<br>±4.163           | 22.100<br>±0.200      | 15.767<br>±0.115             | 6.609<br>±0.342              | 4.667<br>±0.577         | 0.412<br>±0.047              | 46.333<br>±4.726        | 0.097<br>±0.006          | 8.506<br>±1.410                               | 257.940<br>±4.283         | 206.398<br>±3.357        |
|         | OsMYB58-OX #5  | 54.333<br>±2.082            | 37.000<br>±2.000           | 14.867<br>±0.252      | 8.533<br>±2.023              | 2.428<br>±0.452              | 4.000<br>±1.000         | 0.140<br>±0.028              | 12.667<br>±2.517        | 0.042<br>±0.013          | 2.878<br>±0.656                               | 184.824<br>±1.089         | 148.252<br>±0.864        |
|         | OsMYB58-OX #7  | 50.333<br>±4.726            | 36.667<br>±2.517           | 12.667<br>±0.208      | 10.967<br>±1.405             | 2.566<br>±0.270              | 4.000<br>±1.000         | 0.157<br>±0.024              | 14.667<br>±4.509        | 0.039<br>±0.009          | 3.295<br>±0.802                               | 188.646<br>±1.659         | 147.476<br>±3.675        |
|         | OsMYB58-OX #13 | 64.333<br>±3.512            | 41.333<br>±1.528           | 17.223<br>±0.611      | 14.000<br>±1.217             | 2.786<br>±0.150              | 3.667<br>±0.577         | 0.216<br>±0.031              | 13.667<br>±3.055        | 0.051<br>±0.017          | 4.226<br>±0.975                               | 191.851<br>±2.762         | 155.583<br>±7.174        |
|         | OsMYB58-KO #2  | 92.667<br>±1.528            | 47.333<br>±2.082           | 16.667<br>±0.058      | 13.633<br>±0.764             | 6.100<br>±0.414              | 4.667<br>±0.577         | 0.389<br>±0.032              | 38.333<br>±9.018        | 0.137<br>±0.048          | 7.413<br>±2.538                               | 261.711<br>±3.983         | 204.990<br>±1.645        |
|         | OsMYB58-KO #6  | 93.667<br>±2.517            | 48.667<br>±2.082           | 16.367<br>±0.306      | 13.567<br>±0.404             | 6.146<br>±0.773              | 4.333<br>±0.577         | 0.394<br>±0.059              | 39.333<br>±12.503       | 0.125<br>±0.010          | 7.227<br>±2.411                               | 255.733<br>±1.399         | 204.243<br>±1.339        |
|         | OsMYB58-KO #8  | 94.333<br>±4.041            | 51.667<br>±2.082           | 19.700<br>±0.173      | 15.700<br>±1.044             | 6.764<br>±0.262              | 4.333<br>±0.577         | 0.408<br>±0.033              | 41.333<br>±11.590       | 0.139<br>±0.033          | 8.530<br>±0.794                               | 261.241<br>±1.966         | 205.740<br>±5.046        |
| Low Pi  | WT             | 86.000<br>±2.646            | 47.000<br>±4.583           | 19.900<br>±0.200      | 14.133<br>±0.321             | 5.151<br>±0.095              | 5.667<br>±1.155         | 1.183<br>±0.044              | 154.333<br>±3.055       | 0.352<br>±0.037          | 26.724<br>±0.464                              | 190.506<br>±3.224         | 131.529<br>±0.673        |
|         | OsMYB58-OX #5  | 50.667<br>±0.577            | 35.333<br>±2.517           | 13.400<br>±0.265      | 6.633<br>±1.012              | 3.477<br>±0.565              | 3.333<br>±0.577         | 0.510<br>±0.087              | 72.333<br>±9.074        | 0.149<br>±0.014          | 17.849<br>±2.261                              | 133.793<br>±2.267         | 88.158<br>±2.251         |
|         | OsMYB58-OX #7  | 42.667<br>±2.082            | 36.667<br>±1.528           | 12.300<br>±0.794      | 8.467<br>±0.945              | 3.177<br>±0.200              | 3.667<br>±0.577         | 0.551<br>±0.063              | 74.333<br>±6.658        | 0.156<br>±0.026          | 18.135<br>±1.846                              | 140.147<br>±1.974         | 91.022<br>±1.770         |
|         | OsMYB58-OX #13 | 59.333<br>±2.517            | 40.333<br>±3.055           | 14.733<br>±0.551      | 10.400<br>±0.917             | 3.043<br>±0.115              | 3.667<br>±0.577         | 0.650<br>±0.068              | 76.667<br>±7.506        | 0.168<br>±0.032          | 17.647<br>±3.093                              | 138.850<br>±2.137         | 94.746<br>±0.719         |
|         | OsMYB58-KO #2  | 73.333<br>±3.512            | 48.333<br>±1.528           | 15.267<br>±0.115      | 14.500<br>±0.265             | 6.005<br>±0.170              | 6.333<br>±0.577         | 1.013<br>±0.162              | 178.000<br>±9.644       | 0.555<br>±0.076          | 34.011<br>±0.615                              | 190.729<br>±0.490         | 134.402<br>±0.476        |
|         | OsMYB58-KO #6  | 72.667<br>±2.082            | 48.667<br>±2.517           | 15.800<br>±0.100      | 14.333<br>±0.777             | 6.679<br>±0.209              | 6.667<br>±1.528         | 0.995<br>±0.096              | 179.333<br>±7.371       | 0.545<br>±0.057          | 31.644<br>±2.706                              | 193.204<br>±1.512         | 132.225<br>±2.793        |
|         | OsMYB58-KO #8  | 72.667<br>±2.517            | 48.333<br>±2.517           | 16.233<br>±0.651      | 15.833<br>±1.102             | 6.577<br>±0.238              | 6.333<br>±1.155         | 1.080<br>±0.179              | 182.333<br>±10.786      | 0.573<br>±0.083          | 31.021<br>±2.767                              | 185.723<br>±2.847         | 131.000<br>±1.125        |
